# Supplementary material
Source: publisher figshare collection journal article supplement (https://acs.figshare.com/ndownloader/files/27692581)
Supplement: Supplementary file 1 [file 27692581]

## Supplementary information

# Achieving highly efficient carbon dioxide electrolysis by in-situ construction of heterostructure

*Xiaoxia Yang<sup>a</sup>, Wang Sun<sup>\*a</sup>, Minjian Ma<sup>a</sup>, Chunming Xu<sup>a</sup>, Rongzheng Ren<sup>a</sup>, Jinshuo Qiao<sup>a</sup>,  
Zhenhua Wang<sup>a</sup>, Zesheng Li<sup>b</sup>, Shuying Zhen<sup>c</sup> and Kening Sun<sup>\*a</sup>*

a Beijing Institute of Technology, Beijing Key Laboratory for Chemical Power Source and Green Catalysis, Beijing, 100081, People's Republic of China.

b Beijing Institute of Technology, Key Laboratory of Cluster Science of Ministry of Education, 100081, People's Republic of China.

c University of Science and Technology Beijing, State Key Laboratory for Advanced Metals and Materials, Beijing 100081, People's Republic of China

\*Corresponding author: [sunwang@bit.edu.cn](mailto:sunwang@bit.edu.cn) (Wang Sun), [bitkeningsun@163.com](mailto:bitkeningsun@163.com) (Kening Sun)

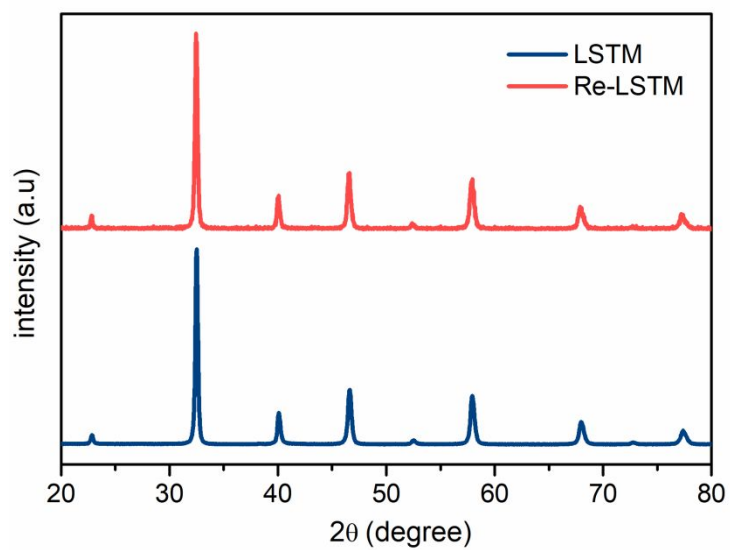

**Figure S1.** X-ray diffraction patterns of  $(\text{La}_{0.2}\text{Sr}_{0.8})_{0.9}\text{Ti}_{0.6}\text{Mn}_{0.4}$  (LSTM) calcined at  $800^\circ\text{C}$  for 5 h and after the reduction treatment at  $800^\circ\text{C}$  in  $10\%\text{H}_2/\text{Ar}$  for 5 h.

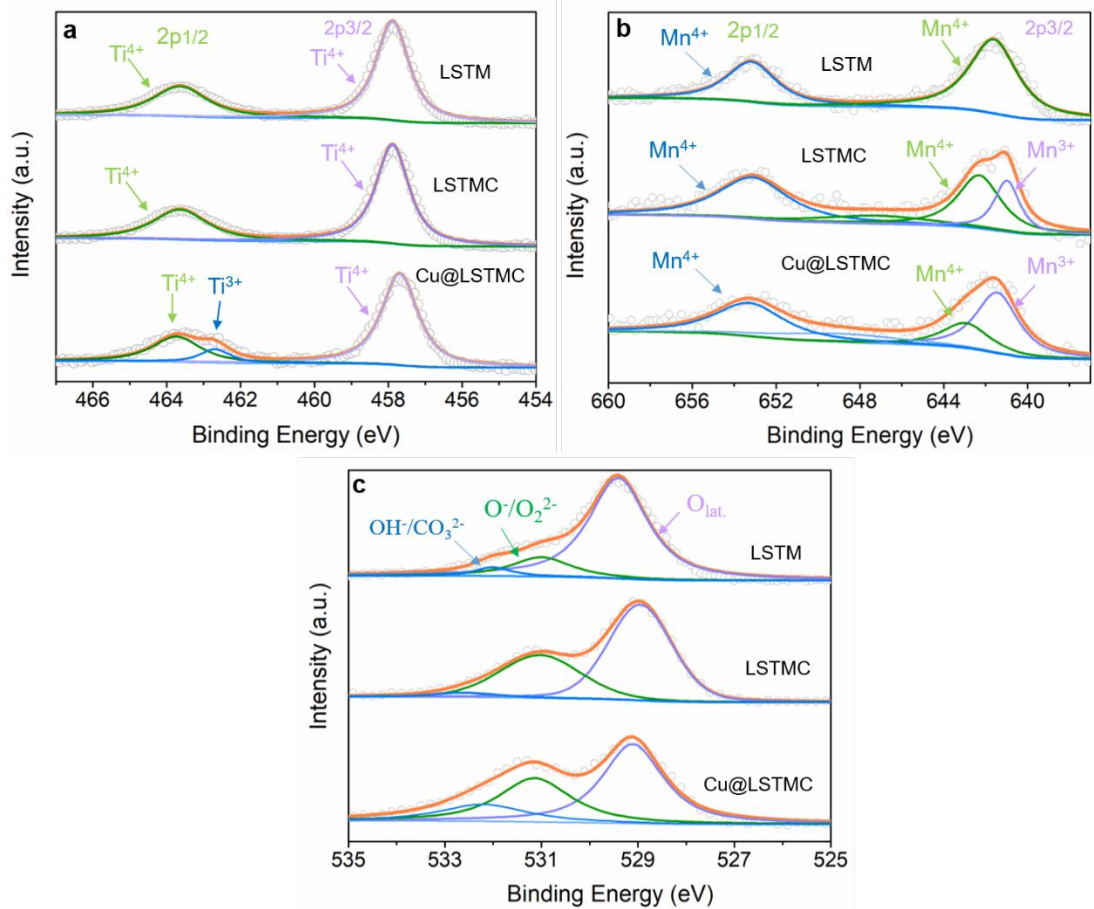

**Figure S2.** XPS spectra of LSTM, LSTMC and Cu@LSTM powders (a) Ti 2p, (b) Mn 2p, (c) O

1s.

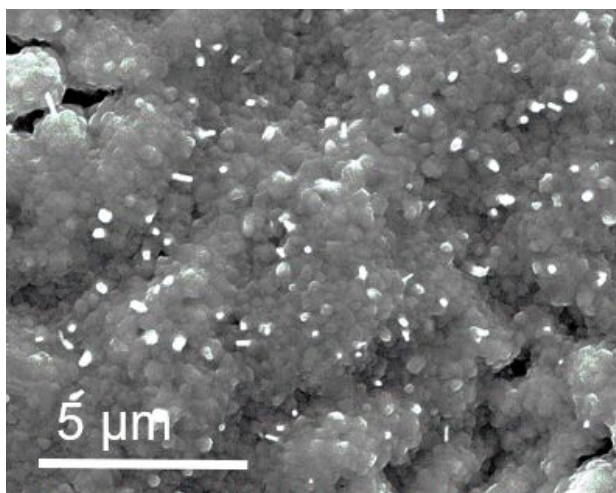

**Figure S3.** SEM image of LSTMC after reduction treatment at 800 °C in 10% $\text{H}_2$ /Ar for 5 h.

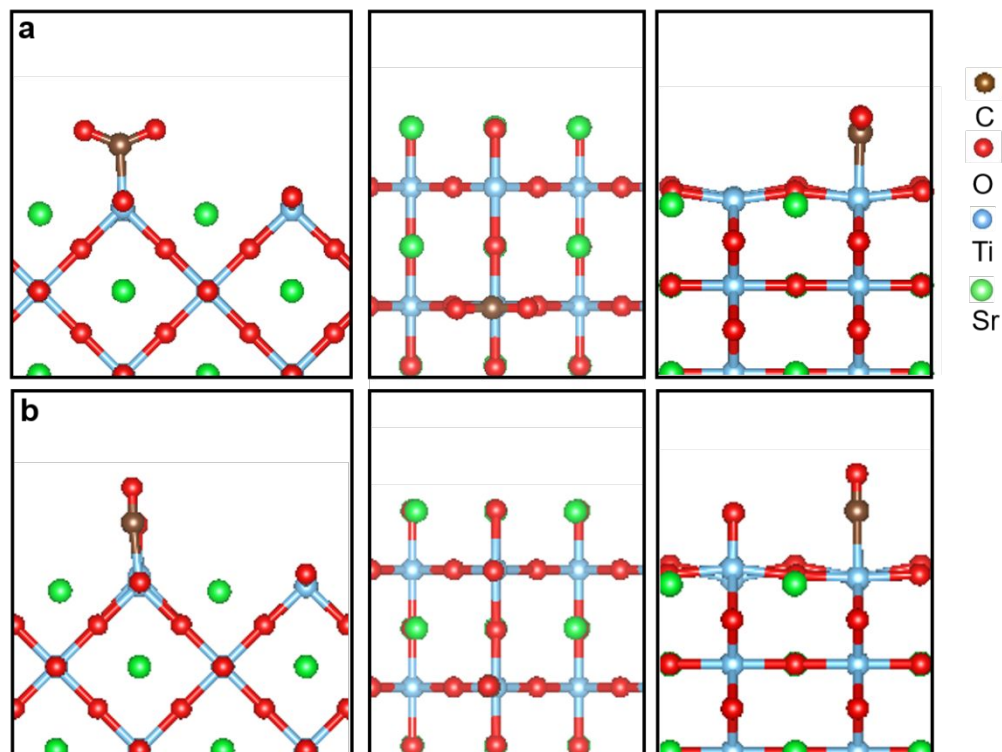

**Figure S4.** Optimized the different perspectives of clean STO system surface, (a) Surface after CO<sub>2</sub> adsorption. (b) structures of the CO<sub>2</sub>RR to CO process including amplified CO\* intermediates. the left panels show front views, the middle panels show top views while right panels give side views.

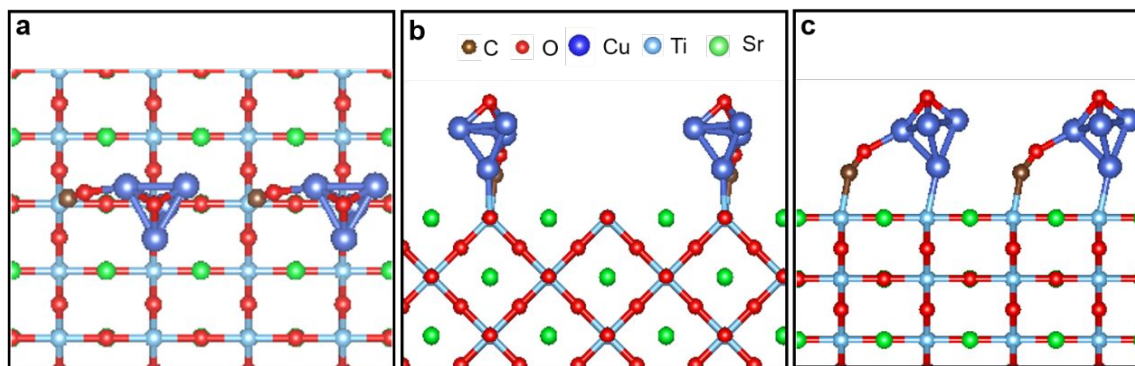

**Figure S5.** DFT calculation results. Optimized geometry structures of the CO<sub>2</sub>RR to CO process including amplified CO\* intermediates on Cu@STO interfaces. (a) top views. (b) front views. (c) side views.

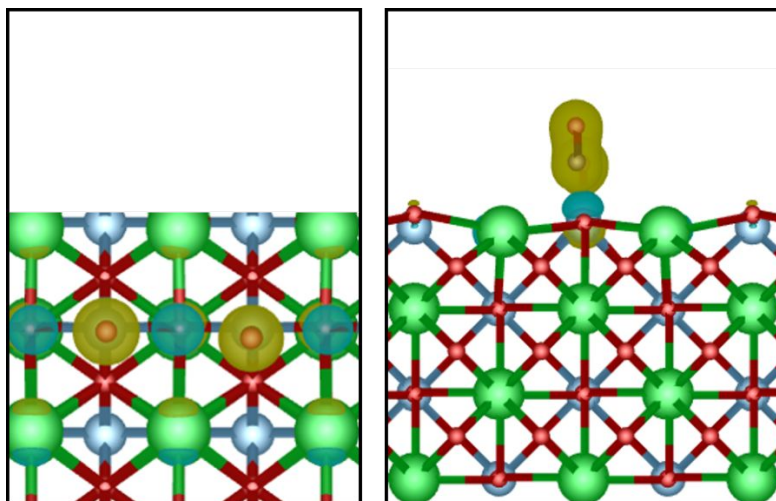

**Figure S6.** Charge density difference iso-surfaces of CO\* and O\* on STO surface. The iso-surfaces in yellow and blue represent charge repulsion and accumulation, respectively.

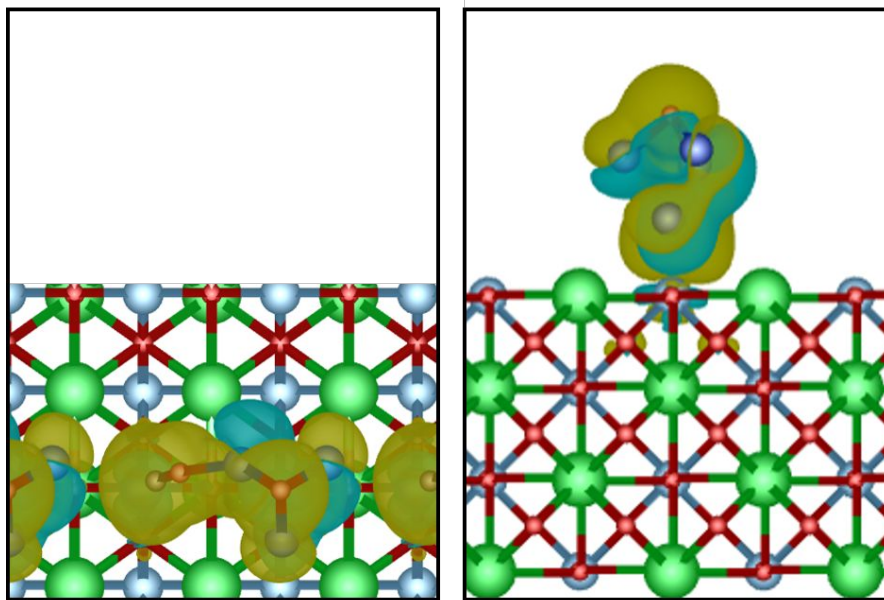

**Figure S7.** Charge density difference iso-surfaces of  $\text{CO}^*$  and  $\text{O}^*$  on  $\text{Cu@STO}$  surface. The iso-surfaces in yellow and blue represent charge repulsion and accumulation, respectively.



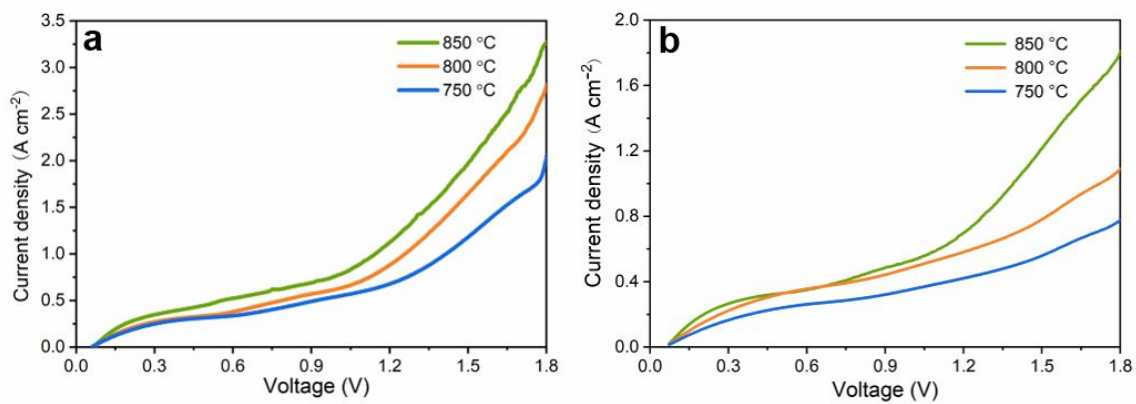

**Figure S8.** AC impedance of the symmetric cells for (a) LSTM. (b) Cu@LSTMC at different temperature.

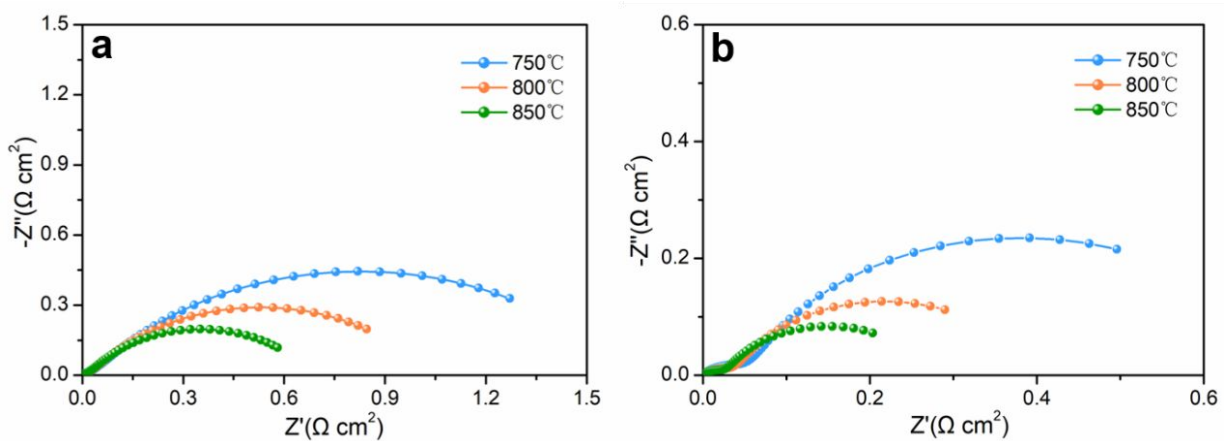

**Figure S9.** AC impedance of the symmetric cells for (a) LSTM. (b) Cu@LSTMC at different temperature.

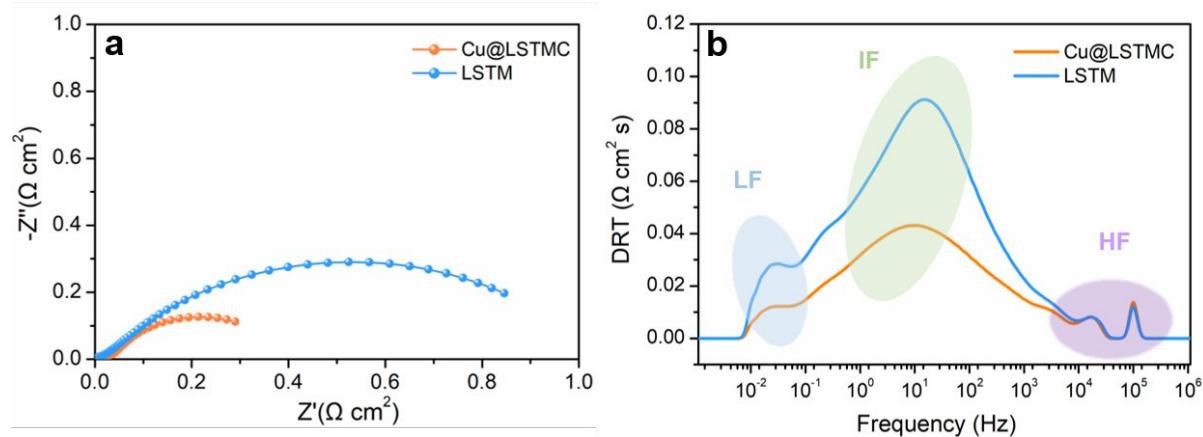

**Figure S10.** (a) The corresponding electrochemical impedance spectra measured under OCV conditions at 800 °C. (b) The DRT plots of the single cell.

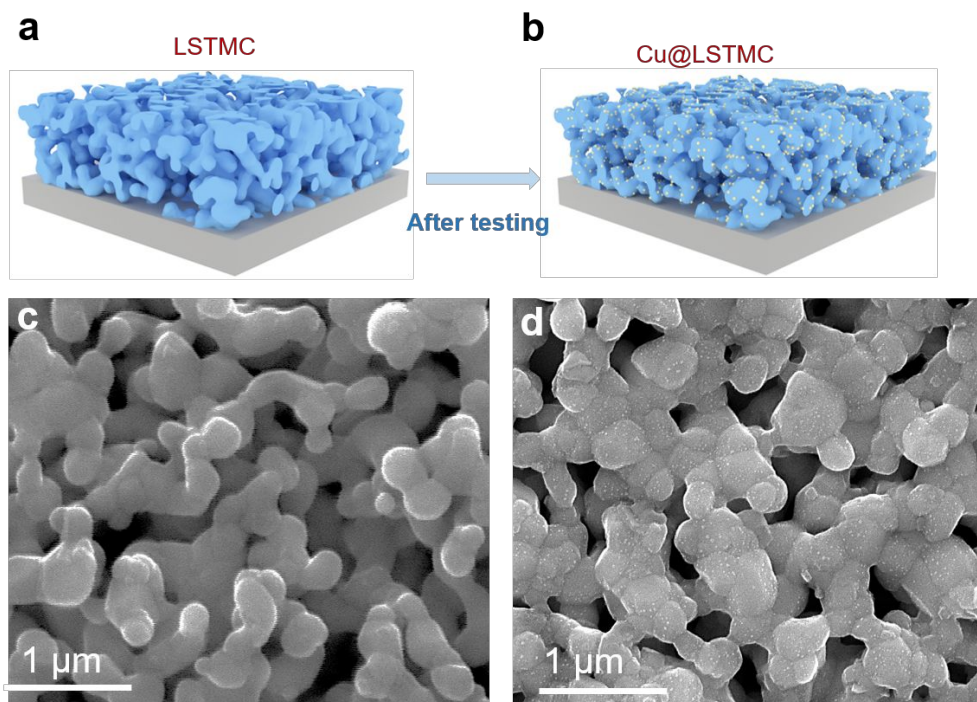

**Figure S11.** (a, b) schematic diagram of the in-situ exsolution process. (c, d) SEM images of cathode surface before and after long-term electrolysis test.

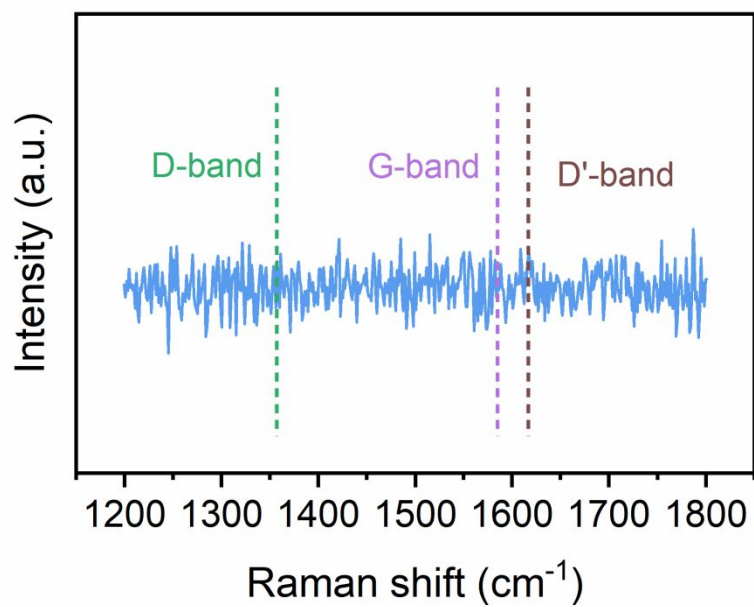

**Figure S12.** The corresponding Raman spectra for the Cu@LSTMC electrode after stability test.

**Table S1.** XPS analysis of O *1s*.

| samples  | B.E. O <i>1s</i> (eV) |                  | O <sub>lat</sub> (at.%) | O <sub>ads</sub> (at.%) |
|----------|-----------------------|------------------|-------------------------|-------------------------|
|          | O <sub>lat</sub>      | O <sub>ads</sub> |                         |                         |
| LSTM     | 529.4                 | 531/532          | 19.8                    | 81.2                    |
| LSTMC    | 529.1                 | 531.1/532.2      | 38.7                    | 61.3                    |
| Cu@LSTMC | 528.95                | 531/532.6        | 48.9                    | 51.1                    |

**Table S2.** Free energy (eV) path of CO<sub>2</sub> reduction.

|        | CO <sub>2</sub> (g) | CO <sub>2</sub> * | CO*+O* | CO(g)+* |
|--------|---------------------|-------------------|--------|---------|
| STO    | 0                   | 1.38              | 1.56   | 0.17    |
| Cu@STO | 0                   | 0.82              | 1.1    | 0.17    |

**Table S3.** The formation energies of oxygen vacancy for different models.

|                                         | STO     | Cu@STO  |
|-----------------------------------------|---------|---------|
| Energy of intact slab (eV)              | -542.33 | -550.12 |
| Energy of slab with oxygen vacancy (eV) | -531.33 | -539.25 |
| Energy of oxygen atom (eV)              | 7.45    | 7.45    |
| Oxygen vacancy formation energy (eV)    | 3.55    | 3.42    |

The oxygen vacancy formation energy was defined as

$$\Delta E_{vac} = E_{slab\ with\ vacancy} + E_{oxygen\ atom} - E_{slab}$$

where  $E_{slab\ with\ vacancy}$ ,  $E_{oxygen\ atom}$ , and  $E_{slab}$  are the electronic energy of the slab model with oxygen vacancy, the oxygen atom referenced to ( $H_2O - H_2$ ), and the intact slab, respectively. Under this definition, a lower value of oxygen vacancy formation energy indicates an easy formation of oxygen vacancy. In this work, the calculated oxygen vacancy formation energies of STO and Cu@STO are 3.55 eV and 3.42 eV, respectively. The lower oxygen vacancy formation energy of Cu@STO suggests that Cu cluster may induce an easier formation of oxygen vacancy.



**Table S4.** Calculated vibrational frequencies (in  $\text{cm}^{-1}$ ) of bending ( $\nu_2$ ), symmetric stretching ( $\nu_1$ ), and asymmetric stretching ( $\nu_3$ ) modes of  $\text{CO}_2$ , and calculated vibrational stretching frequency (in  $\text{cm}^{-1}$ ) of CO ( $\nu$ ) in gas phase and adsorbed phases.

|                    | $\text{CO}_2$ |         |         | CO    |
|--------------------|---------------|---------|---------|-------|
|                    | $\nu_2$       | $\nu_1$ | $\nu_3$ | $\nu$ |
| Gas phase          | 645           | 1300    | 2334    | 2089  |
| Adsorbed on STO    | 701           | 1166    | 1570    | 1951  |
| Adsorbed on Cu@STO | 671           | 1188    | 1416    | 1597  |
